# Supplementary material
Source: PubMed Central journal article supplement (PMC7354920)
Supplement: pnas.1918919117.sapp.pdf [file pnas.1918919117.sapp.pdf]

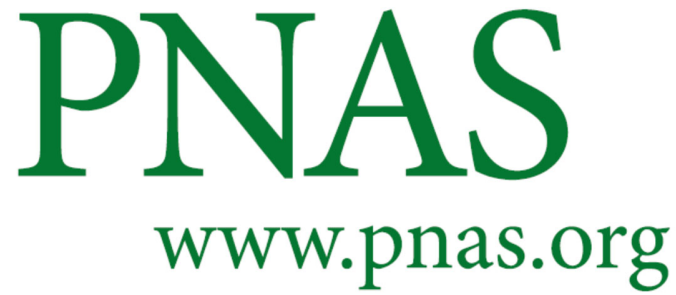

## Supplementary Information for

Real-time monitoring of the *in vivo* redox state transition using the ratiometric redox state sensor protein FROG/B

Kazunori Sugiura, Shoko Mihara, Nae Fu, and Toru Hisabori

Toru Hisabori

Email: [thisabor@res.titech.ac.jp](mailto:thisabor@res.titech.ac.jp)

### **This PDF file includes:**

Figs. S1 to S3

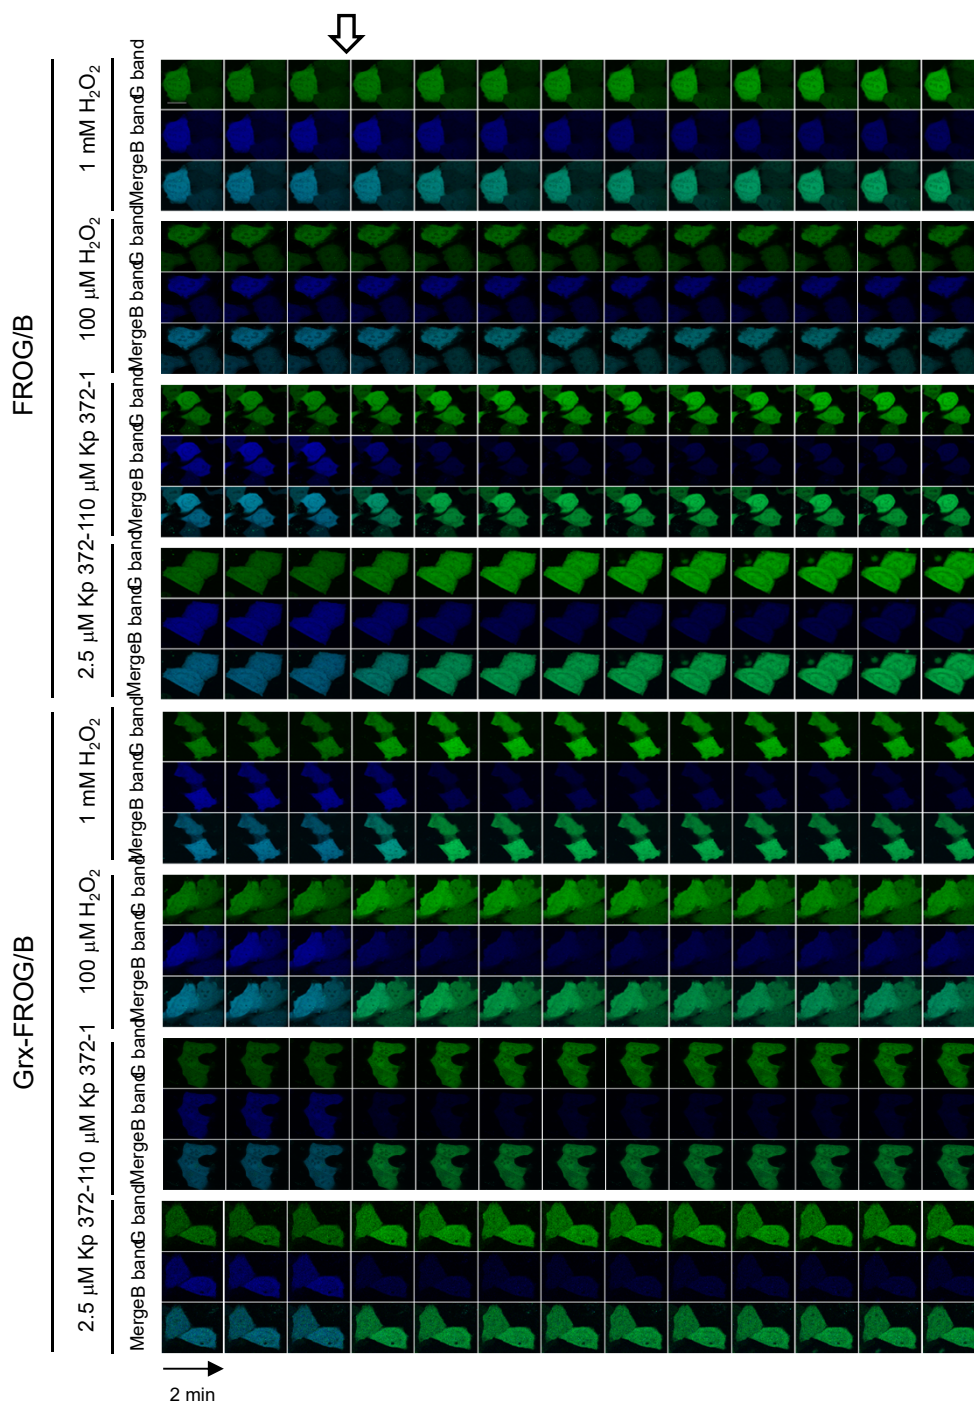

**Supplementary Figure 1. Redox imaging of FROG/B in HeLa cells.** Imaging of the ROS induction in HeLa cells. Cells expressing FROG/B and Grx-FROG/B were observed under a confocal fluorescence microscope. Fluorescence images of the blue range (420–482 nm), the green range (500–562 nm), and merged images at the indicated time periods are shown at 2-min intervals. Scale bar, 20  $\mu\text{m}$ . At 5 min (indicated as an open arrow), 1 mM  $\text{H}_2\text{O}_2$ , 0.1 mM  $\text{H}_2\text{O}_2$ , 10  $\mu\text{M}$  Kp372-1, or 2.5  $\mu\text{M}$  Kp372-1 was added.

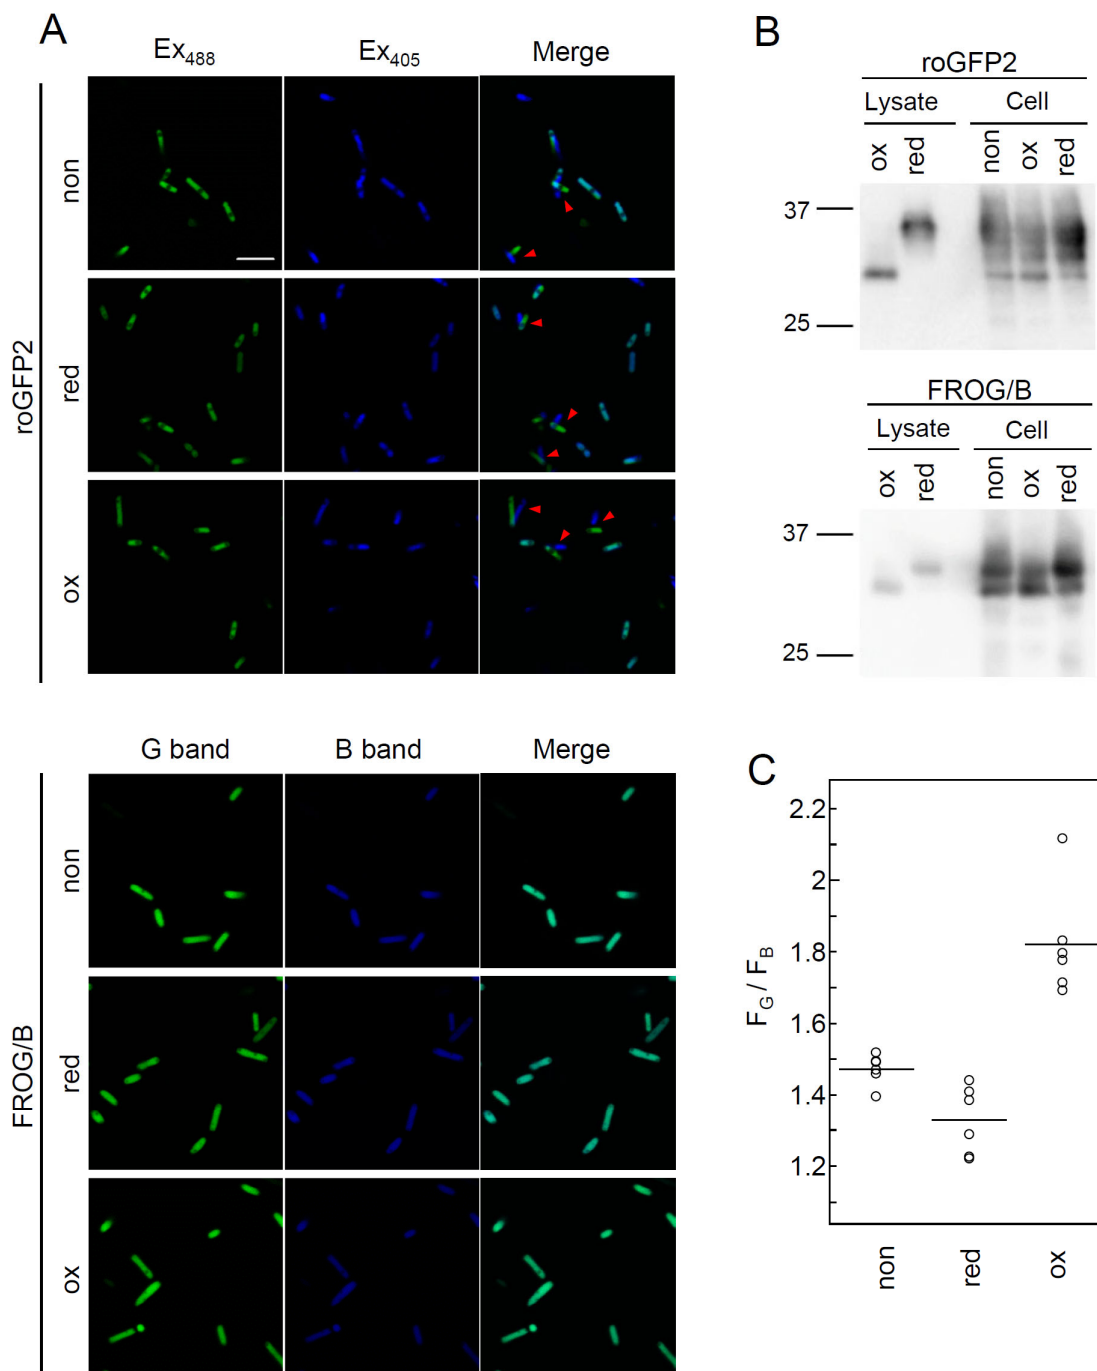

**Supplementary Figure 2. Redox imaging in *E. coli* cells.** (A) Fluorescent imaging of redox changes in *E. coli* cells expressing roGFP or FROG/B. Cells expressing roGFP2 that migrate during measurements are indicated by red arrows. (B) Confirmation of the redox state of sensor proteins in *E. coli* cells. Cells used for the fluorescent imaging (A) were collected and used for the SDS-PAGE analysis of the redox states of sensor proteins using AMS. The protein bands were visualized using anti-GFP antibodies. Fully oxidized or reduced cell lysates were used as controls. (C)  $F_G/F_B$  signal ratios of FROG/B in *E. coli* cells. The short bars indicate the averaged values. For oxidation, cells were incubated with 1 mM diamide for 1h, and for reduction 10 mM DTT<sub>red</sub> was used.

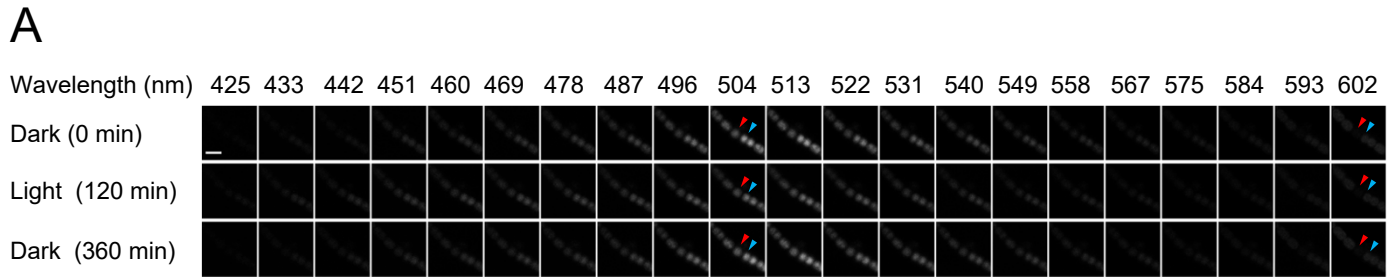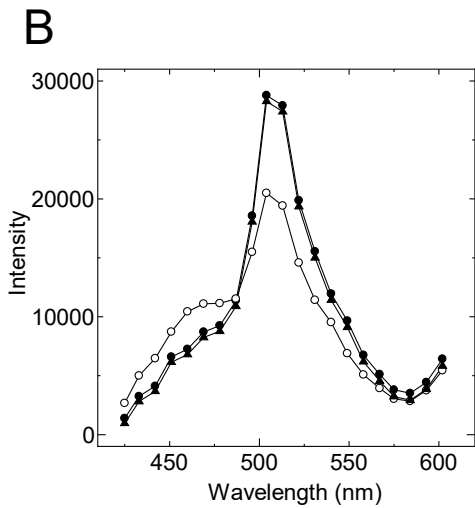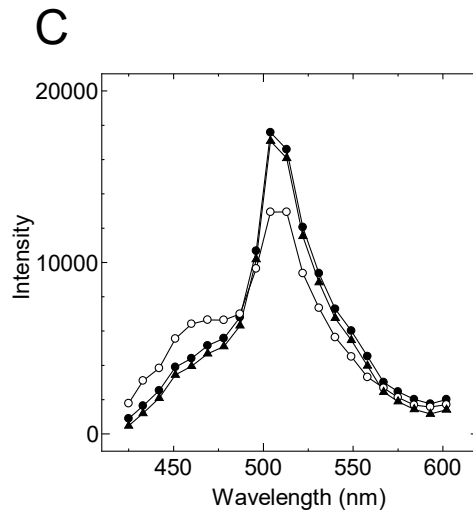

**Supplementary Figure 3. Spectrum images of FROG/B in *Anabaena* 7120.** Emission spectra of FROG/B in *Anabaena* 7120 cells measured using confocal microscopy. (A) Fluorescent images of *Anabaena* 7120 cells of each channels under mutual light ( $50 \mu\text{mol photons m}^{-2} \text{s}^{-1}$ )/dark conditions. Scale bar,  $5 \mu\text{m}$ . (B, C) Emission spectra of FROG/B in the typical vegetative cell (B) and heterocyst (C) indicated by cyan arrows and a red arrows in Fig. S2A respectively at 0 min (closed circle), 120 min (open circle) and 360 min (closed triangle). Time scale corresponds with that in Fig. 4D.
